# Supplementary material for: Worldwide Selection Footprints for Drought and Heat in Bread Wheat (Triticum aestivum L.)
Source: MDPI journal article supplement (doi:10.3390/plants11172289), 2022-09-01
Supplement: s1 [file s1]

## Supplementary Information

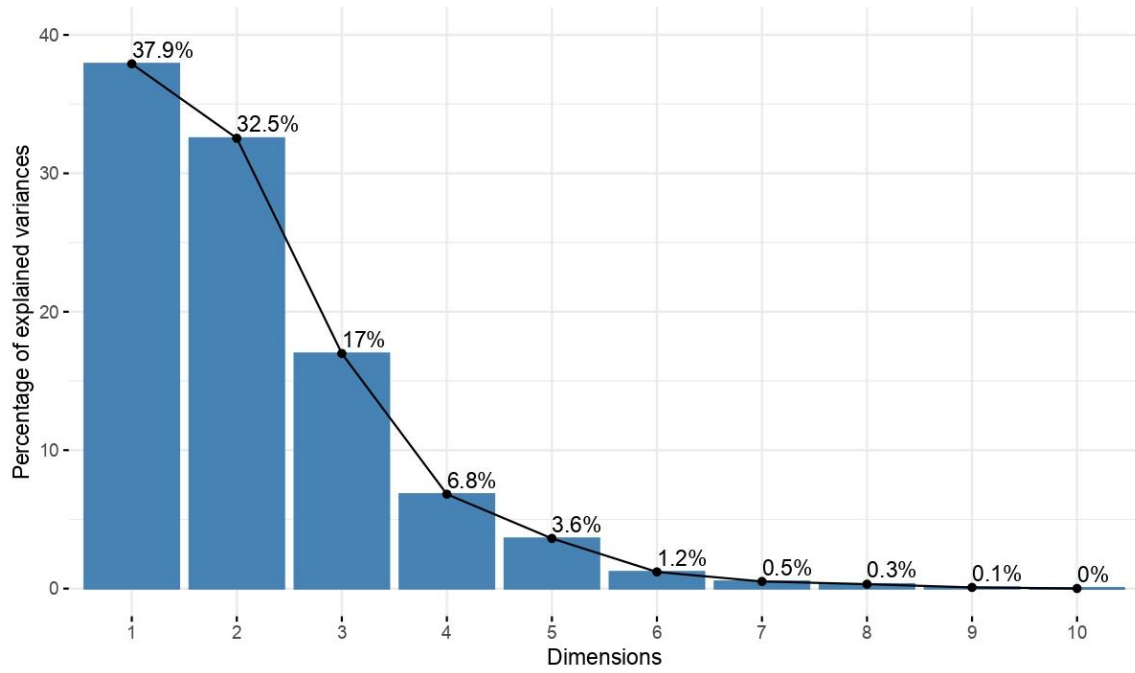

a)

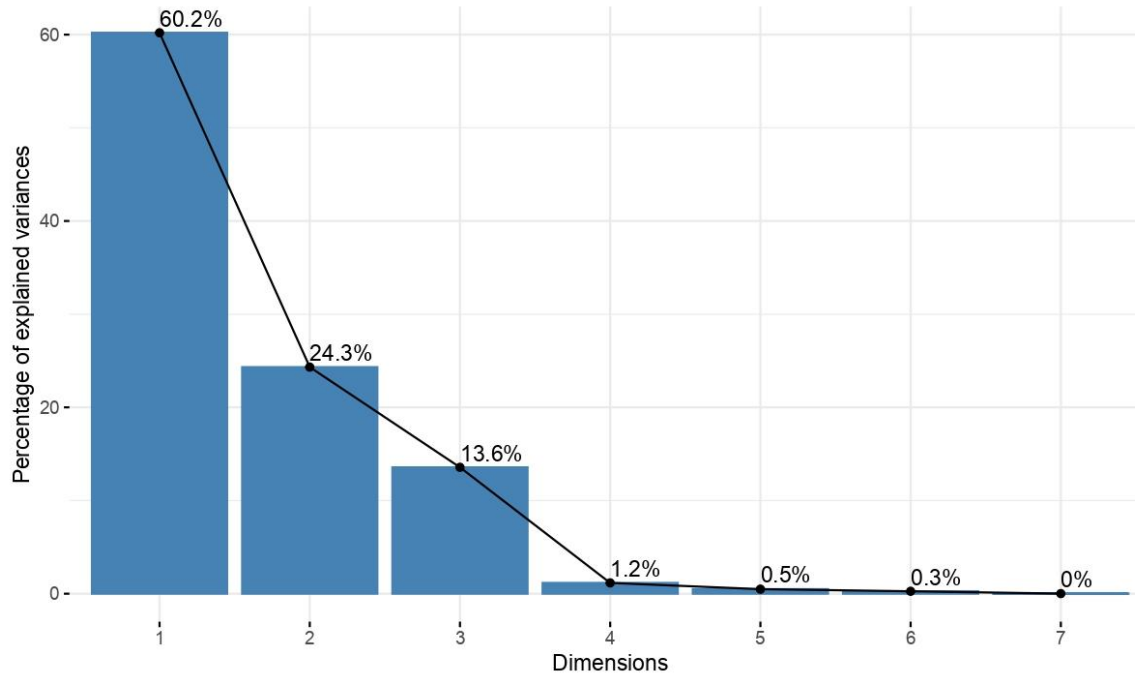

b)

**Figure S1.** Contributions to the total variation of each component for the evaluated variables in the PCA. a) Bioclimatic variables related to aridity; b) Temperature related variables, calculated indices, AP, and ELEV.

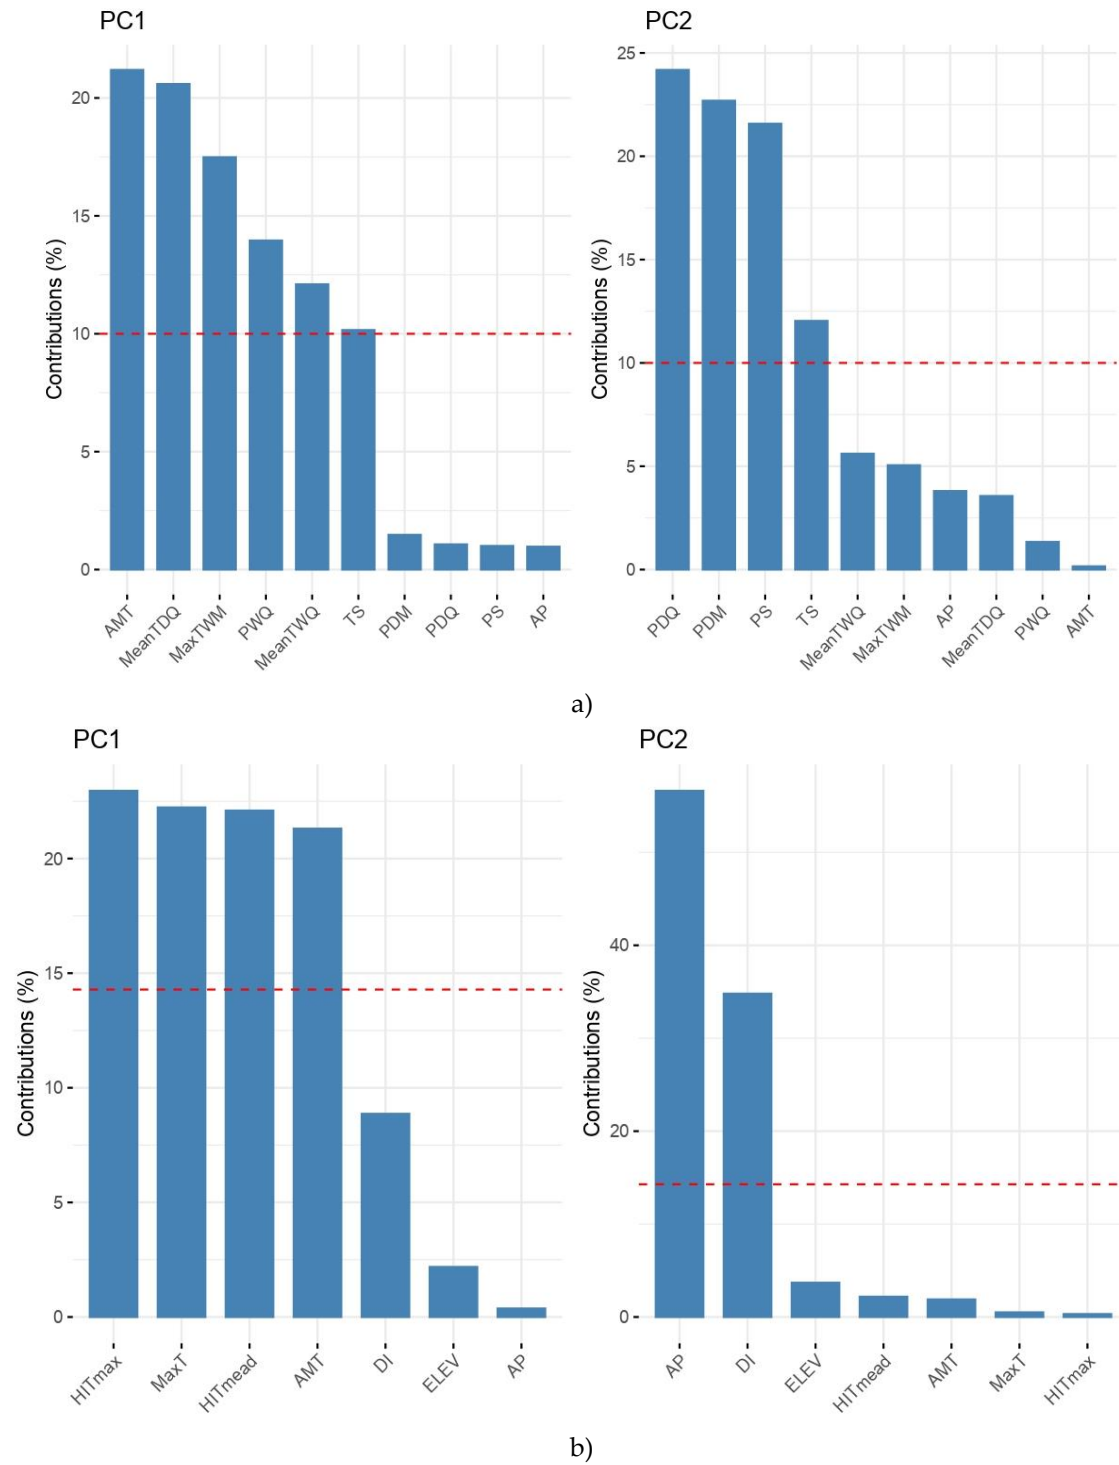

**Figure S2.** Contributions to component principals 1 and 2 for the evaluated variables in the PCA. a) Bioclimatic variables related to aridity; b) Temperature related variables, calculated indices, AP, and ELEV.

Table S1. Detection of associated SNPs for seven climatic variables.

| Var  | Chr | No. | SNP                         | Physical position<br>(bp) | <i>P-value</i> | SNPs  | Genes |
|------|-----|-----|-----------------------------|---------------------------|----------------|-------|-------|
| AMT  | 1A  | 1   | 108825112 F 0-19:T>A-19:T>A | 277825486                 | 6.60E-09       | 2     | 1     |
|      |     | 2   | 108891114 F 0-33:A>G-33:A>G | 388440316                 | 5.89E-09       |       | 1     |
|      | 1D  | 3   | 108739422 F 0-31:T>A-31:T>A | 2113561                   | 1.49E-06       | 1     | 1     |
|      | 2D  | 4   | 108968402 F 0-23:C>T-23:C>T | 79989524                  | 9.63E-07       | 1     | 2     |
|      | 3D  | 5   | 107698139 F 0-48:C>T-48:C>T | 97153088                  | 4.42E-07       | 2     | 1     |
|      |     | 6   | 108308207 F 0-18:G>A-18:G>A | 546672913                 | 2.49E-07       |       | 2     |
|      | 4D  | 7   | 109431634 F 0-54:G>A-54:G>A | 370691683                 | 5.90E-10       | 1     | 3     |
|      | 5D  | 8   | 108305241 F 0-68:A>G-68:A>G | 379130055                 | 1.29E-06       | 1     | 1     |
|      |     |     |                             |                           |                | Total | 12    |
| MaxT | 1A  | 1   | 108825112 F 0-19:T>A-19:T>A | 277825486                 | 8.02E-08       | 2     | 1     |
|      |     | 2   | 108891114 F 0-33:A>G-33:A>G | 388440316                 | 1.32E-16       |       | 1     |
|      | 3A  | 3   | 106510612 F 0-30:C>T-30:C>T | 502971897                 | 2.05E-07       | 3     | 2     |
|      |     | 4   | 108476623 F 0-32:T>A-32:T>A | 507114154                 | 4.55E-07       |       | 2     |
|      | 5D  | 5   | 108028914 F 0-20:A>G-20:A>G | 574516154                 | 1.86E-07       | 1     | 2     |
|      |     | 6   | 109431634 F 0-54:G>A-54:G>A | 370691683                 | 1.09E-16       |       | 3     |
|      | 6A  | 7   | 108652995 F 0-58:G>C-58:G>C | 528660566                 | 1.50E-08       | 1     | 1     |
|      | 6D  | 8   | 109126792 F 0-49:C>T-49:C>T | 5854616                   | 1.23E-06       | 1     | 2     |
|      | 7A  | 9   | 108582786 F 0-49:T>G-49:T>G | 143959936                 | 1.95E-12       | 2     | 2     |
|      |     | 10  | 108830300 F 0-9:T>G-9:T>G   | 64789408                  | 3.05E-10       |       | 2     |
|      | 7B  | 11  | 109126469 F 0-35:G>A-35:G>A | 662017143                 | 8.41E-07       | 2     | 2     |
|      |     | 12  | 107878167 F 0-16:G>A-16:G>A | 107522176                 | 1.30E-06       | 1     | 2     |
|      |     |     |                             |                           |                | Total | 22    |
| AP   | 1A  | 1   | 108256081 F 0-24:C>G-24:C>G | 588647447                 | 1.25E-07       | 1     | 1     |
|      | 2A  | 2   | 109058266 F 0-7:C>T-7:C>T   | 640221452                 | 1.32E-07       | 1     | 2     |
|      | 2B  | 3   | 107797386 F 0-11:T>G-11:T>G | 91596926                  | 1.14E-09       | 2     | 1     |
|      |     | 4   | 107593284 F 0-50:T>A-50:T>A | 768567114                 | 3.32E-07       |       | 1     |
|      | 4A  | 5   | 108145069 F 0-52:C>A-52:C>A | 714179675                 | 1.02E-06       | 1     | 2     |
|      | 5B  | 6   | 109305833 F 0-34:C>G-34:C>G | 526249013                 | 1.56E-06       | 1     | 1     |
|      | 6B  | 7   | 109177937 F 0-11:A>G-11:A>G | 223441723                 | 1.81E-07       | 2     | 1     |
|      |     | 8   | 109523315 F 0-24:C>T-24:C>T | 269818400                 | 1.26E-06       |       | 0     |
|      |     |     |                             |                           |                | Total | 9     |
| PS   | 1D  | 1   | 107874524 F 0-37:G>C-37:G>C | 485539732                 | 1.89E-07       | 1     | 3     |
|      | 2A  | 2   | 108020469 F 0-43:T>C-43:T>C | 711971015                 | 1.78E-08       | 2     | 2     |
|      |     | 3   | 108514047 F 0-10:A>C-10:A>C | 729345577                 | 3.13E-08       |       | 2     |
|      | 2B  | 4   | 107794074 F 0-23:T>C-23:T>C | 76022529                  | 9.09E-08       | 2     | 2     |
|      |     | 5   | 109021888 F 0-34:T>C-34:T>C | 795754781                 | 1.02E-07       |       | 1     |
|      | 3B  | 6   | 108953425 F 0-21:A>G-21:A>G | 50526285                  | 1.78E-06       | 3     | 1     |
|      |     | 7   | 107601308 F 0-23:G>A-23:G>A | 741467423                 | 1.38E-09       |       | 0     |
|      |     | 8   | 108516380 F 0-24:T>C-24:T>C | 758205945                 | 5.53E-10       |       | 1     |

Table S1. Continued.

| Var     | Chr | No. | SNP                         | Physical position<br>(bp) | <i>P</i> -value | SNPs  | Genes |
|---------|-----|-----|-----------------------------|---------------------------|-----------------|-------|-------|
| PS      | 4B  | 9   | 106772473 F 0-11:T>G-11:T>G | 39759168                  | 4.41E-07        | 1     | 1     |
|         | 5A  | 10  | 107001591 F 0-37:T>C-37:T>C | 619468262                 | 3.81E-07        | 1     | 2     |
|         | 5B  | 11  | 108348543 F 0-58:A>G-58:A>G | 548120559                 | 2.48E-08        | 2     | 1     |
|         |     | 12  | 109119258 F 0-68:T>C-68:T>C | 577227418                 | 4.69E-09        |       | 2     |
|         | 6B  | 13  | 109354013 F 0-58:A>G-58:A>G | 485290761                 | 2.50E-08        | 1     | 2     |
|         | 7A  | 14  | 108619258 F 0-17:C>T-17:C>T | 552606647                 | 1.35E-08        | 1     | 1     |
|         | 7B  | 15  | 108981313 F 0-8:C>T-8:C>T   | 650581291                 | 5.17E-08        | 1     | 1     |
|         |     |     |                             |                           |                 | Total | 22    |
| HITmead | 1A  | 1   | 108891114 F 0-33:A>G-33:A>G | 388440316                 | 9.11E-18        | 1     | 1     |
|         | 1B  | 2   | 108853213 F 0-26:C>T-26:C>T | 201700273                 | 4.52E-07        | 1     | 1     |
|         | 1D  | 3   | 107880401 F 0-66:C>T-66:C>T | 413939387                 | 1.53E-07        | 1     | 2     |
|         | 2B  | 4   | 107488994 F 0-17:T>C-17:T>C | 29129965                  | 1.44E-08        | 1     | 3     |
|         | 3B  | 5   | 108146856 F 0-65:T>A-65:T>A | 764282419                 | 2.77E-07        | 1     | 1     |
|         | 3D  | 6   | 107698139 F 0-48:C>T-48:C>T | 97153088                  | 1.25E-08        | 1     | 1     |
|         | 4A  | 7   | 109242168 F 0-13:A>G-13:A>G | 598521397                 | 4.39E-08        | 1     | 2     |
|         | 4B  | 8   | 108145974 F 0-24:T>C-24:T>C | 56276689                  | 3.44E-07        | 1     | 1     |
|         |     | 9   | 109363420 F 0-34:G>A-34:G>A | 62303691                  | 1.34E-08        |       | 2     |
|         | 4D  | 10  | 108773963 F 0-37:C>T-37:C>T | 97959582                  | 1.59E-06        | 3     | 2     |
|         |     | 11  | 109431634 F 0-54:G>A-54:G>A | 370691683                 | 1.50E-08        |       | 3     |
|         | 5B  | 12  | 109240982 F 0-38:G>C-38:G>C | 68925700                  | 2.02E-12        | 2     | 1     |
|         |     | 13  | 108773279 F 0-51:C>T-51:C>T | 530916378                 | 8.04E-07        |       | 2     |
|         | 7A  | 14  | 107178221 F 0-24:T>G-24:T>G | 628906923                 | 1.54E-06        | 1     | 2     |
|         |     |     |                             |                           |                 | Total | 24    |
| HITmax  | 1A  | 1   | 108825112 F 0-19:T>A-19:T>A | 277825486                 | 8.48E-09        | 2     | 1     |
|         |     | 2   | 108891114 F 0-33:A>G-33:A>G | 388440316                 | 1.94E-11        |       | 1     |
|         | 2B  | 3   | 108024073 F 0-47:C>T-47:C>T | 38321752                  | 3.81E-09        | 1     | 2     |
|         | 3A  | 4   | 108476623 F 0-32:T>A-32:T>A | 507114154                 | 1.68E-08        | 2     | 2     |
|         |     | 5   | 108028914 F 0-20:A>G-20:A>G | 574516154                 | 7.31E-11        |       | 2     |
|         | 3B  | 6   | 109122135 F 0-40:A>G-40:A>G | 535641207                 | 9.91E-07        | 1     | 1     |
|         | 3D  | 7   | 108308207 F 0-18:G>A-18:G>A | 546672913                 | 4.37E-07        | 2     | 2     |
|         |     | 8   | 109610030 F 0-20:C>T-20:C>T | 575639014                 | 6.69E-08        |       | 2     |
|         | 4A  | 9   | 109242168 F 0-13:A>G-13:A>G | 598521397                 | 1.94E-09        | 1     | 2     |
|         | 4D  | 10  | 109431634 F 0-54:G>A-54:G>A | 370691683                 | 4.78E-09        | 1     | 3     |
|         | 6D  | 11  | 108582786 F 0-49:T>G-49:T>G | 143959936                 | 1.42E-09        | 1     | 2     |
|         |     |     |                             |                           |                 | Total | 20    |
| DI      | 2B  | 1   | 108980638 F 0-33:T>C-33:T>C | 584134131                 | 2.76E-08        | 1     | 1     |
|         | 2D  | 2   | 107489027 F 0-34:C>T-34:C>T | 302776397                 | 1.41E-07        | 1     | 1     |
|         | 5B  | 3   | 109305833 F 0-34:C>G-34:C>G | 526249013                 | 4.31E-07        | 1     | 1     |
|         | 7A  | 4   | 108206445 F 0-49:C>A-49:C>A | 67617920                  | 5.04E-08        | 2     | 1     |
|         |     | 5   | 107952026 F 0-63:G>C-63:G>C | 498861613                 | 3.70E-07        |       | 1     |
|         | 7D  | 6   | 109035950 F 0-29:C>T-29:C>T | 88318125                  | 1.89E-07        | 1     | 1     |
|         |     |     |                             |                           |                 |       | 6     |

Table S2. Other genes and proteins identified by GEA with seven climatic variables.

| Chr                               | SNP                         | Gene               | Variable        | Protein                                                     | Function                                                           |
|-----------------------------------|-----------------------------|--------------------|-----------------|-------------------------------------------------------------|--------------------------------------------------------------------|
| <b>Morphological responses</b>    |                             |                    |                 |                                                             |                                                                    |
| 2B                                | 107488994 F 0-17:T>C-17:T>C | TraesCS2B02G060700 | HITmead         | Fbox ( <i>FBX</i> ).                                        | Regulation of multiple developmental processes.                    |
| 2B                                | 108980638 F 0-33:T>C-33:T>C | TraesCS2B02G410500 | DI              | Ovate Family Proteins ( <i>OFP</i> ).                       | Morphological regulation in response to stress signals.            |
| 4B                                | 106772473 F 0-11:T>G-11:T>G | TraesCS4B02G051500 | PS              | Transcription factor SCREAM2 ( <i>SCRM2</i> ).              | Constitutive stomatal differentiation in the epidermis.            |
| 4B                                | 108145974 F 0-24:T>C-24:T>C | TraesCS4B02G064000 | HITmead         | Growth regulating factor 1 ( <i>GIF1</i> ).                 | Regulation of cell expansion in foliar tissues and cotyledons.     |
| 4D                                | 108773963 F 0-37:C>T-37:C>T | TraesCS4D02G117100 | HITmead         | Fbox ( <i>FBX</i> ).                                        | Regulation of multiple developmental processes.                    |
| 6B                                | 109177937 F 0-11:A>G-11:A>G | TraesCS6B02G190600 | AP              | ADP-ribosylation factor GTPase ( <i>AGD12</i> ).            | Calcium-dependent proteins that affect gravitropism in <i>AT</i> . |
| 6B                                | 109354013 F 0-58:A>G-58:A>G | TraesCS6B02G269700 | PS              | Similar to OCL1 homeobox ( <i>ROC5</i> ).                   | Modulates the curling of the leaves.                               |
| <b>Responses to biotic stress</b> |                             |                    |                 |                                                             |                                                                    |
| 2A                                | 108514047 F 0-10:A>C-10:A>C | TraesCS2A02G499400 | PS              | Pelota homolog ( <i>PELO</i> ).                             | Defense responses to bacteria.                                     |
| 3A                                | 108028914 F 0-20:A>G-20:A>G | TraesCS3A02G329100 | MaxT and HITmax | rRNA N-glycosidase ( <i>RIP</i> ).                          | Antibacterial and antifungal activity.                             |
| 3B                                | 108146856 F 0-65:T>A-65:T>A | TraesCS3B02G523300 | HITmead         | Disease resistance ( <i>NBS-LRR</i> ).                      | Disease resistance genes in plants.                                |
| 3D                                | 109610030 F 0-20:C>T-20:C>T | TraesCS3D02G475300 | HITmax          | Protein LIFEGUARD 4 ( <i>LFG4</i> ).                        | Defense response to pathogens.                                     |
| 4A                                | 108145069 F 0-52:C>A-52:C>A | TraesCS4A02G447200 | AP              | Disease resistance ( <i>NBS-LRR</i> ).                      | Disease resistance genes in plants.                                |
| 5B                                | 108773279 F 0-51:C>T-51:C>T | TraesCS5B02G349800 | HITmead         | Flavin-containing monooxygenase ( <i>FMO</i> ).             | Defense response to pathogens.                                     |
| 5B                                | 109119258 F 0-68:T>C-68:T>C | TraesCS5B02G400100 | PS              | Cyclic nucleotide-gated ion channel 2 ( <i>CNGC2</i> ).     | Defense response to pathogens.                                     |
| <b>Photosynthesis</b>             |                             |                    |                 |                                                             |                                                                    |
| 2A                                | 108020469 F 0-43:T>C-43:T>C | TraesCS2A02G467700 | PS              | (S)-2-hydroxy-acid oxidase ( <i>GLO1</i> ).                 | Photorespiration and regulation of photosynthesis.                 |
| 2D                                | 108968402 F 0-23:C>T-23:C>T | TraesCS2D02G136200 | AMT             | Magnesium-chelatase subunit, chloroplastic ( <i>CHLH</i> ). | Chlorophyll biosynthesis.                                          |
| 4D                                | 109363420 F 0-34:G>A-34:G>A | TraesCS4D02G086900 | HITmead         | Rieske (2Fe-2S) domain ( <i>PSB33</i> ).                    | Assembly and stabilization of the PSII.                            |
| 5D                                | 107001591 F 0-37:T>C-37:T>C | TraesCS5A02G437100 | PS              | Photosystem II reaction center L ( <i>psbL</i> ).           | The PSII core proteins.                                            |
| 7A                                | 108830300 F 0-9:T>G-9:T>G   | TraesCS7A02G107200 | MaxT            | Gamma carbonic anhydrase 1 ( $\gamma$ CA1).                 | Photorespiration.                                                  |
| 7D                                | 109035950 F 0-29:C>T-29:C>T | TraesCS7D02G138100 | DI              | Cytochrome b6-f complex subunit 5 ( <i>PETG</i> ).          | Electron transfer between PSII and PSI.                            |

Table S2. Continued.

| Chr                          | SNP                         | Gene               | Variable                       | Protein                                                         | Function                          |
|------------------------------|-----------------------------|--------------------|--------------------------------|-----------------------------------------------------------------|-----------------------------------|
| <b>Flowering</b>             |                             |                    |                                |                                                                 |                                   |
| 1A                           | 108891114 F 0-33:A>G-33:A>G | TraesCS1A02G220300 | AMT, MaxT, HITmead and HITmax. | CONSTANS-like ( <i>COL</i> ).                                   | Regulation of floral development. |
| 2A                           | 109058266 F 0-7:C>T-7:C>T   | TraesCS2A02G390500 | AP                             | Casein kinase II subunit beta ( <i>CK2</i> ).                   | Circadian Regulation.             |
| 2B                           | 107488994 F 0-17:T>C-17:T>C | TraesCS2B02G059500 | HITmead                        | Flowering promoting factor 1 ( <i>FPP1</i> ).                   | Control of flowering time.        |
| 3B                           | 108953425 F 0-21:A>G-21:A>G | TraesCS3B02G081800 | PS                             | Adenylyl-sulfate kinase ( <i>APK</i> ).                         | Circadian Regulation.             |
| <b>Nutrient assimilation</b> |                             |                    |                                |                                                                 |                                   |
| 2A                           | 109058266 F 0-7:C>T-7:C>T   | TraesCS2A02G390800 | AP                             | Metal-nicotianamine transporter ( <i>YSL1</i> ).                | Iron uptake and transport.        |
| 3A                           | 108028914 F 0-20:A>G-20:A>G | TraesCS3A02G329700 | MaxT and HITmax                | Purple acid phosphatase ( <i>PAP</i> ).                         | Nutritional deficiencies.         |
| 7B                           | 107878167 F 0-16:G>A-16:G>A | TraesCS7B02G093800 | MaxT                           | Starch synthase, chloroplastic/amyloplastic ( <i>wSs2a-3</i> ). | Starch biosynthesis.              |
